# Supplementary material
Source: publisher figshare collection journal article supplement (https://sage.figshare.com/ndownloader/files/15300944)
Supplement: Supplementary file 1 [file 15300944]

## Supplementary data:

| Supplementary Table 1: Drug levels in mothers and their offspring. |                      |      |                          |                     |                 |                    |                     |                       |                     |                                                                                                                                                                                              |
|--------------------------------------------------------------------|----------------------|------|--------------------------|---------------------|-----------------|--------------------|---------------------|-----------------------|---------------------|----------------------------------------------------------------------------------------------------------------------------------------------------------------------------------------------|
| Drug                                                               | First author         | Year | Number                   | Maternal drug level | Cord drug level | Placental transfer | Days from last dose | Breastmilk drug level | Drug level in child | Comments / Observations                                                                                                                                                                      |
| Infliximab (IFX)                                                   | Mahadevan (abstract) | 2007 | 5                        | 9.88 µg/mL          | 10.9 µg/mL      | 1.03               | 30.4                |                       |                     | IFX detectable up to 6 months from delivery. Low maternal IFX levels were associated with shorter IFX exposure times in the newborn.                                                         |
|                                                                    | Zelinkova            | 2011 | 4                        | 3.08 µg/mL          | 8.05 µg/mL      | 2.62               | 87.5                | -                     |                     | IFX was not detected in one mother (and infant) who had her last infusion at 21w. FU for 3-6/12 showed normal infant dev w no problems with childhood infections or vaccinations.            |
|                                                                    | Zelinkova            | 2013 | 12 samples of cord blood |                     | 6.4 µg/mL       |                    | NA                  |                       |                     | IFX was lower in those who stopped > 10w prior to delivery 2.8 µg/mL vs. 10 µg/mL in those who stopped closer to delivery. * Exact gestation of last dose not available in individual cases. |
|                                                                    | Mahadevan            | 2013 | 11                       | 11.52 µg/mL         | 14.44 µg/mL     | 1.25               | 41.2                | -                     | -                   | * Cord levels only available for 9/11                                                                                                                                                        |
|                                                                    | Julsgaard            | 2016 | 18 *stopped <30 weeks    | 0.6 µg/mL           | 2.2 µg/mL       | 3.67               | NA                  | -                     |                     | * Median values provided (unusually those stopped <30 weeks had higher ratios than those stopped ≥ 30weeks). Exact gestation of last dose not available.                                     |
|                                                                    |                      |      | 26 *continued ≥ 30 weeks | 4 µg/mL             | 10 µg/mL        | 2.5                | NA                  | -                     |                     |                                                                                                                                                                                              |
|                                                                    | Kanis (abstract)     | 2016 | 18 *stopped < 25 weeks   | -                   | 1.9 µg/mL       |                    | NA                  |                       |                     | Cord IFX levels were significantly higher than ADA. Exact gestation last dose given not available.                                                                                           |
| 19 *continued ≥ 25 weeks                                           |                      |      | -                        | 13.4 µg/mL          |                 | NA                 |                     |                       |                     |                                                                                                                                                                                              |
| Matro                                                              | 2018                 | 29   | -                        | -                   | -               | -                  | -                   | 0.74 µg/mL            |                     | IFX was detectable only in 66% of breastmilk samples.                                                                                                                                        |

| Supplementary Table 1: Drug levels in mothers and their offspring. |                  |      |                          |                     |                 |                    |                                                   |                       |                                                                                                                                                       |                                                                                                                                           |
|--------------------------------------------------------------------|------------------|------|--------------------------|---------------------|-----------------|--------------------|---------------------------------------------------|-----------------------|-------------------------------------------------------------------------------------------------------------------------------------------------------|-------------------------------------------------------------------------------------------------------------------------------------------|
| Drug                                                               | First author     | Year | Number                   | Maternal drug level | Cord drug level | Placental transfer | Days from last dose                               | Breastmilk drug level | Drug level in child                                                                                                                                   | Comments / Observations                                                                                                                   |
| Etanercept (ETN)                                                   | Murashima        | 2009 | 1                        | 2239ng/ml           | 81 ng/ml        | 0.04               | NA                                                | 3.5ng/ml              | Undetectable                                                                                                                                          | ETN administered 25mg twice a week. ETN cleared from neonate < 12w of delivery despite regular breastfeeding.                             |
|                                                                    | Keeling          | 2010 | 1                        | -                   | -               | -                  | NA                                                | 4.48-7.0 ng/ml        | -                                                                                                                                                     | ETN levels in breastmilk peaked about 72 hours post dose but remained therapeutically insignificant levels.                               |
|                                                                    | Berthelsen       | 2011 | 1                        | 540ng/ml            | 40ng/ml         | 0.07               | 7                                                 | 2-5                   | <2                                                                                                                                                    | Receiving ETN 25mg weekly.                                                                                                                |
|                                                                    | Ostensen         | 2011 | 1                        | -                   | -               | -                  | -                                                 | 25-75.4 ng/ml         | -                                                                                                                                                     | ETN administered 30 days post-partum; peak levels in breastmilk were 36 hours after administration.                                       |
| Adalimumab (ADA)                                                   | Julsgaard        | 2013 | 1                        | 300ng/ml            | 150ng/ml        | 0.5                | 150.5                                             | -                     | Undetectable at 3 months.                                                                                                                             | ADA stopped at 16w, delivered at 37.5 weeks. Infant cleared ADA by 3 months.                                                              |
|                                                                    | Mahadevan        | 2011 | 5                        | 2.78 µg/mL          | 4.72 µg/mL      | 1.69               | 28.8                                              | -                     | -                                                                                                                                                     | One mother had undetectable ADA levels after 42 days, but another had 1.84µg/mL 56 days after the last dose.                              |
|                                                                    | Zelinkova        | 2013 | 6 cord samples           | -                   | 1.7 µg/mL       | -                  | NA                                                | -                     | -                                                                                                                                                     | One child whose mother stopped ADA at 22w had undetectable drug levels. * Exact gestation of last dose not available in individual cases. |
|                                                                    | Mahadevan        | 2013 | 10                       | 4.73 µg/mL          | 7.02 µg/mL      | 1.48               | 28.8                                              | -                     | -                                                                                                                                                     |                                                                                                                                           |
|                                                                    | Julsgaard        | 2016 | 7 * stopped < 30 weeks   | 0.3µg/mL            | 0.2 µg/mL       | 0.67               | NA                                                | -                     | * Median values provided. Those who stopped ADA < 30 w had lower ratios than those who stopped ADA ≥ 30w. Exact gestation of last dose not available. |                                                                                                                                           |
|                                                                    |                  |      | 29 * continued ≥ 30weeks | 2.1 µg/mL           | 2.5 µg/mL       | 1.19               | NA                                                | -                     |                                                                                                                                                       |                                                                                                                                           |
|                                                                    | Kanis (abstract) | 2016 | 19 * stopped <24weeks    | -                   | 0.9 µg/mL       | NA                 | Cord IFX levels are significantly higher than ADA |                       |                                                                                                                                                       |                                                                                                                                           |
| 10 * continued ≥ 24weeks                                           |                  |      | -                        | 4.1 µg/mL           | NA              |                    |                                                   |                       |                                                                                                                                                       |                                                                                                                                           |
| Matro                                                              | 2018             | 21   | -                        | -                   | -               | -                  | 0.71 µg/mL                                        | -                     | ADA was detected in only 9.5% of breastmilk samples.                                                                                                  |                                                                                                                                           |

| Supplementary Table 1: Drug levels in mothers and their offspring. |                      |      |        |                     |                 |                    |                     |                       |                     |                                                                                                                                          |
|--------------------------------------------------------------------|----------------------|------|--------|---------------------|-----------------|--------------------|---------------------|-----------------------|---------------------|------------------------------------------------------------------------------------------------------------------------------------------|
| Drug                                                               | First author         | Year | Number | Maternal drug level | Cord drug level | Placental transfer | Days from last dose | Breastmilk drug level | Drug level in child | Comments / Observations                                                                                                                  |
| Certolizumab (CTZ)                                                 | Mahadevan (abstract) | 2009 | 1      | 18.83 µg/mL         | 1.65 µg/mL      | 0.09               | 14                  | -                     | -                   | CTZ 400mg every 4w from 2nd trimester. 37w 2700g infant without congenital anomalies.                                                    |
|                                                                    | Mahadevan            | 2013 | 10     | 24.43 µg/mL         | 0.75 µg/mL      | 0.03               | 19.2                | n=5 undetectable      | -                   | * n=10 women with 12 deliveries (2 sets of twins); 4 cord blood samples undetectable                                                     |
|                                                                    | Mariette (CRIB)      | 2018 | 16     | 23.69 µg/mL         | 0.008µg/mL      | 0.0003             | 11.1                |                       |                     | * Only 15 cord samples, only n=3 had quantifiable CTZ levels                                                                             |
|                                                                    | Matro                | 2018 | 13     | -                   | -               | -                  | -                   | 0.29 µg/mL            |                     | TCZ detected in only 23% of breastmilk samples.                                                                                          |
| Golimumab                                                          | Matro                | 2018 | 1      | -                   | -               | -                  | -                   | NA                    |                     | GLM not detected in any breast milk (0%)                                                                                                 |
| Canakinumab (CKM)                                                  | Egawa                | 2017 | 1      | 7.16 µg/mL          | 15.1 µg/mL      | 2.1                | 35                  | -                     | -                   | 150mg CKM every 4-5w.                                                                                                                    |
| Tocilizumab (TCZ)                                                  | Saito                | 2018 | 2      | -                   | -               | -                  | -                   | <2 - 68.2 ng/ml       | -                   | Peak TCZ in breastmilk was 3 days after administration. Breast milk levels of tocilizumab ranged from 1/500 to 1/1000 of those in serum. |
| Ustekinumab (UTK)                                                  | Matro                | 2018 | 6      | -                   | -               | -                  | -                   | 1.57 µg/mL            |                     | UTK detected in 66.7% of breastmilk samples.                                                                                             |
|                                                                    | Rowan                | 2018 | 1      | 4.3µg/ml            | 8.0 µg/ml       | 1.86               | 28                  | -                     | -                   | Delivered at 37w, of a 2948g male with no anomalies.                                                                                     |
| Rituximab (RTX)                                                    | Friedrichs           | 2006 | 1      | 9750 µg/mL          | 32095 µg/mL     | 3.29               | 147                 |                       |                     | RTX commenced at 16w with 4x weekly cycles of 375mg/m <sup>2</sup> till remission for Burkitt's lymphoma. Delivered at 41w of a female.  |
|                                                                    | Decker               | 2006 | 1      | 200 mg/L (0.2g/L)   | 300 mg/L        | 1.5                | 35                  | -                     |                     | RTX administered on week 16 and 28; delivered at 33weeks.                                                                                |
|                                                                    | Klink                | 2008 | 1      | 24 mg/L             | 6.7mg/ml        | 0.28               | 28                  | -                     |                     | RTX administered week 30 and 34; delivered at 38 weeks.                                                                                  |
